# Supplementary material for: Hypoxia induces mitochondrial protein lactylation to limit oxidative phosphorylation
Source: PubMed Central journal article supplement (PMC10770133; doi:10.1038/s41422-023-00864-6), 2024-01-02
Supplement: 41422_2023_864_MOESM6_ESM.pdf [file 41422_2023_864_MOESM6_ESM.pdf]

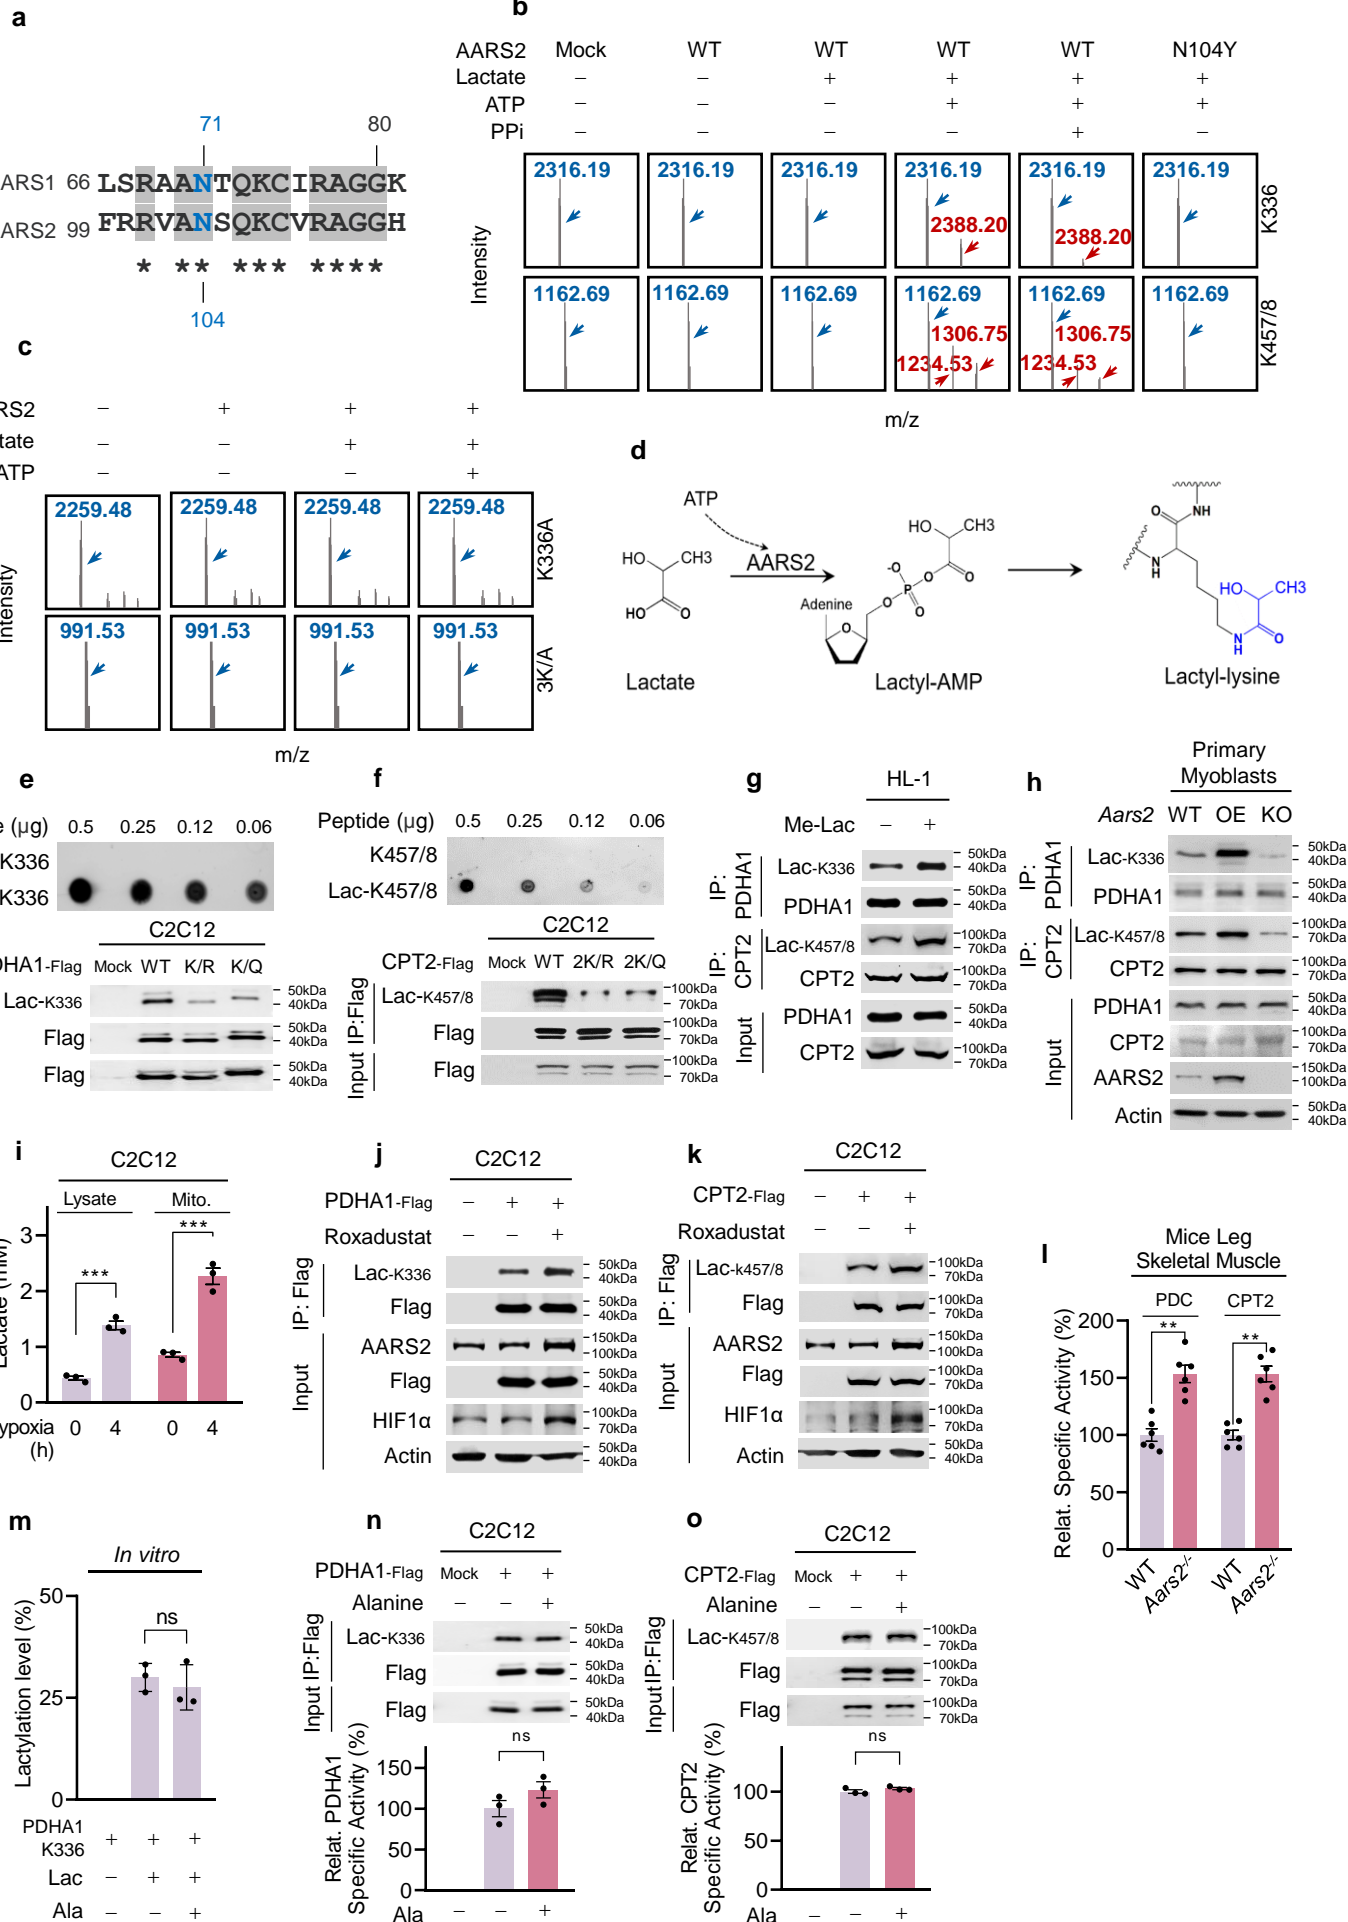

## Supplementary information, Fig. S6 Lactylation inactivates PDHA1 and CPT2

**a** AARS1 N71 corresponds to AARS2 N104. The conserved asparagine in AARS1 N71 and AARS2 N104 are aligned.

**b** AARS2 lactylates PDHA1 K336 and CPT2 K457/8 peptides *in vitro*. 10 mM lactate, 10 nM AARS2, and 0.05 mg/mL synthetic substrate peptide were included in the reaction mix. The reaction was determined at 37°C for 3 h, which was subsequently desalted and subjected to analysis by mass spectrometer. MS results are shown (Fig. 5b).

**c** AARS2 fails to lactylate the peptides devoid of lysine. The ability of AARS2 to lactylate PDHA1 and CPT2 peptides in which K336 and K457/8 of each had been switched to alanine was detected by MS.

**d** Schematic of the catalytic mechanism underlying AARS2-mediated protein lysine lactylation. In the presence of AARS2, ATP and lactate are converted to lactyl-AMP, which contains a high-energy carbonyl-phosphate bond that modifies the  $\epsilon$ -amine of lysine side chains.

**e, f** Verification of lactylation antibodies. Reactivities of site-specific PDHA1 K336 polyclonal antibody (**e**), and CPT2 K457/8 polyclonal antibody (**f**) were tested using dot blotting against synthetic unlactylated and lactylated peptides and western blotting to detect lactylation in PDHA1 and CPT2 and their lactylation-null mutants.

**g** Lactate-induced Lac-K336 and Lac-K457/8 in HL-1 cells. Lac-K336 levels and Lac-K457/8 levels of PDHA1 and CPT2, that was purified from HL-1 cells that had been cultured with or without 10 mM Me-Lac in the culture media, were detected.

**h** AARS2 regulates Lac-K336 and Lac-K457/8 in mouse primary myoblasts. Lac-K336 and Lac-K457/8 levels of PDHA1 and CPT2, that was purified from wildtype, AARS2-overexpressing and *Aars2* knockout (KO) mouse primary myoblasts, were detected.

**i** Hypoxia increases lactate levels in lysate and mitochondria. Lactate levels in lysate and in mitochondria of C2C12 cells that were cultured in a hypoxia chamber for indicated time durations, were detected (n=3).

**j, k** Roxadustat induces Lac-K336 and Lac-K457/8 in mouse leg skeletal muscles. Lac-K336 levels (**j**) and Lac-K457/8 levels (**k**) in PDHA1 and CPT2 purified from untreated and 50  $\mu$ M roxadustat-treated C2C12 cells, were detected.

**l** AARS2 knockout (KO) activates PDC and CPT2. Specific activities of PDC and CPT2, isolated from WT and *Aars2*<sup>-/-</sup> mouse leg skeletal muscles were detected (n=6).

**m** Alanine does not affect lactylation of PDHA1 K336 *in vitro*. Physiologic levels (0.5 mM) alanine's ability to inhibit K336 lactylation *in vitro* was detected by mass spectrometer *in vitro* (n=3).

**n, o** Alanylation does not affect lactylation and the activities of PDHA1 and CPT2. The Lac-K336 levels and PDHA1 specific activity (**n**) as well as Lac-K457/8 levels and CPT2 specific activity (**o**) of ectopically expressed proteins in C2C12 cells and 10 mM alanine-treated C2C12 cells, were measured 4 h after treatment.

All data are reported as mean  $\pm$  SEM of three independent experiments. Statistical significance was assessed by unpaired two-tailed Student's t-test and two-way ANOVA: \*\* $P < 0.01$ ; \*\*\* $P < 0.001$ ; ns no significance.
